# Supplementary material
Source: Copernicus journal article supplement (doi:10.5194/se-17-867-2026)
Supplement: Supplementary file [file se-17-867-2026-supplement-title-page.pdf › se-17-867-2026-supplement-title-page.pdf]

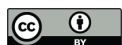

*Supplement of*

**A vast Caledonian fan and an Ediacaran arc: the contrasting provenance of Devonian clastics of Brunia (Bohemian Massif)**

**Stephen Collett et al.**

*Correspondence to:* Stephen Collett ([stephen.collett@geology.cz](mailto:stephen.collett@geology.cz))

- [se-17-867-2026-supplement-title-page.pdf](#)
- [S1. Analytical methods.docx](#)
- [S2. Isotopic data.xlsx](#)
- [S3. Data used for construction of figure 9.xlsx](#)

The copyright of individual parts of the supplement might differ from the article licence.
